# Supplementary material
Source: HighWire-hosted journal article supplement (https://jnm.snmjournals.org/highwire/filestream/94926/field_highwire_adjunct_files/0/173831_Supplemental_Data.pdf)
Supplement: 173831_Supplemental_Data.pdf [file 173831_Supplemental_Data.pdf]

### Abbreviations and Their Definitions

| Abbreviation        | Definition                              |
|---------------------|-----------------------------------------|
| <sup>18</sup> F-FDG | <sup>18</sup> F-fluorodeoxyglucose      |
| <sup>18</sup> F-FCH | <sup>18</sup> F-fluoromethylcholine     |
| PVE                 | Partial-volume effect                   |
| PVC                 | Partial-volume correction               |
| <b>PVC methods:</b> |                                         |
| IDC-LR              | Iterative deconvolution Lucy–Richardson |
| HH-GLBL             | Global background-adapted PVC           |
| HH-LCL              | Local background-adapted PVC            |
| Spill-over          | Mask-based spill-over PVC               |
| PSF-reconstruction  | Point spread function reconstruction    |
| VOI                 | Volume of interest                      |
| <b>VOI methods:</b> |                                         |
| 42MAX               | 42% of maximal voxel                    |
| 50MAX               | 50% of maximal voxel                    |
| A42MAX              | 42% of maximal voxel + background       |
| A50MAX              | 50% of maximal voxel + background       |
| A50PEAK             | 50% of peak voxel + background          |
| A70PEAK             | 70% of peak voxel + background          |
| RTL                 | Relative threshold level                |
| RC                  | Recovery coefficient                    |
| AC                  | Activity concentration                  |
| SUVmean             | Mean standardized uptake value          |
| TLG                 | Total lesion glycolysis                 |
| ICC                 | Intraclass correlation coefficient      |
| FWHM                | Full width at half maximum              |
| BLOB-OS-TF          | Iterative time-of-flight reconstruction |
| NSCLC               | Non–small cell lung cancer              |
| mPC                 | Metastatic prostate cancer              |

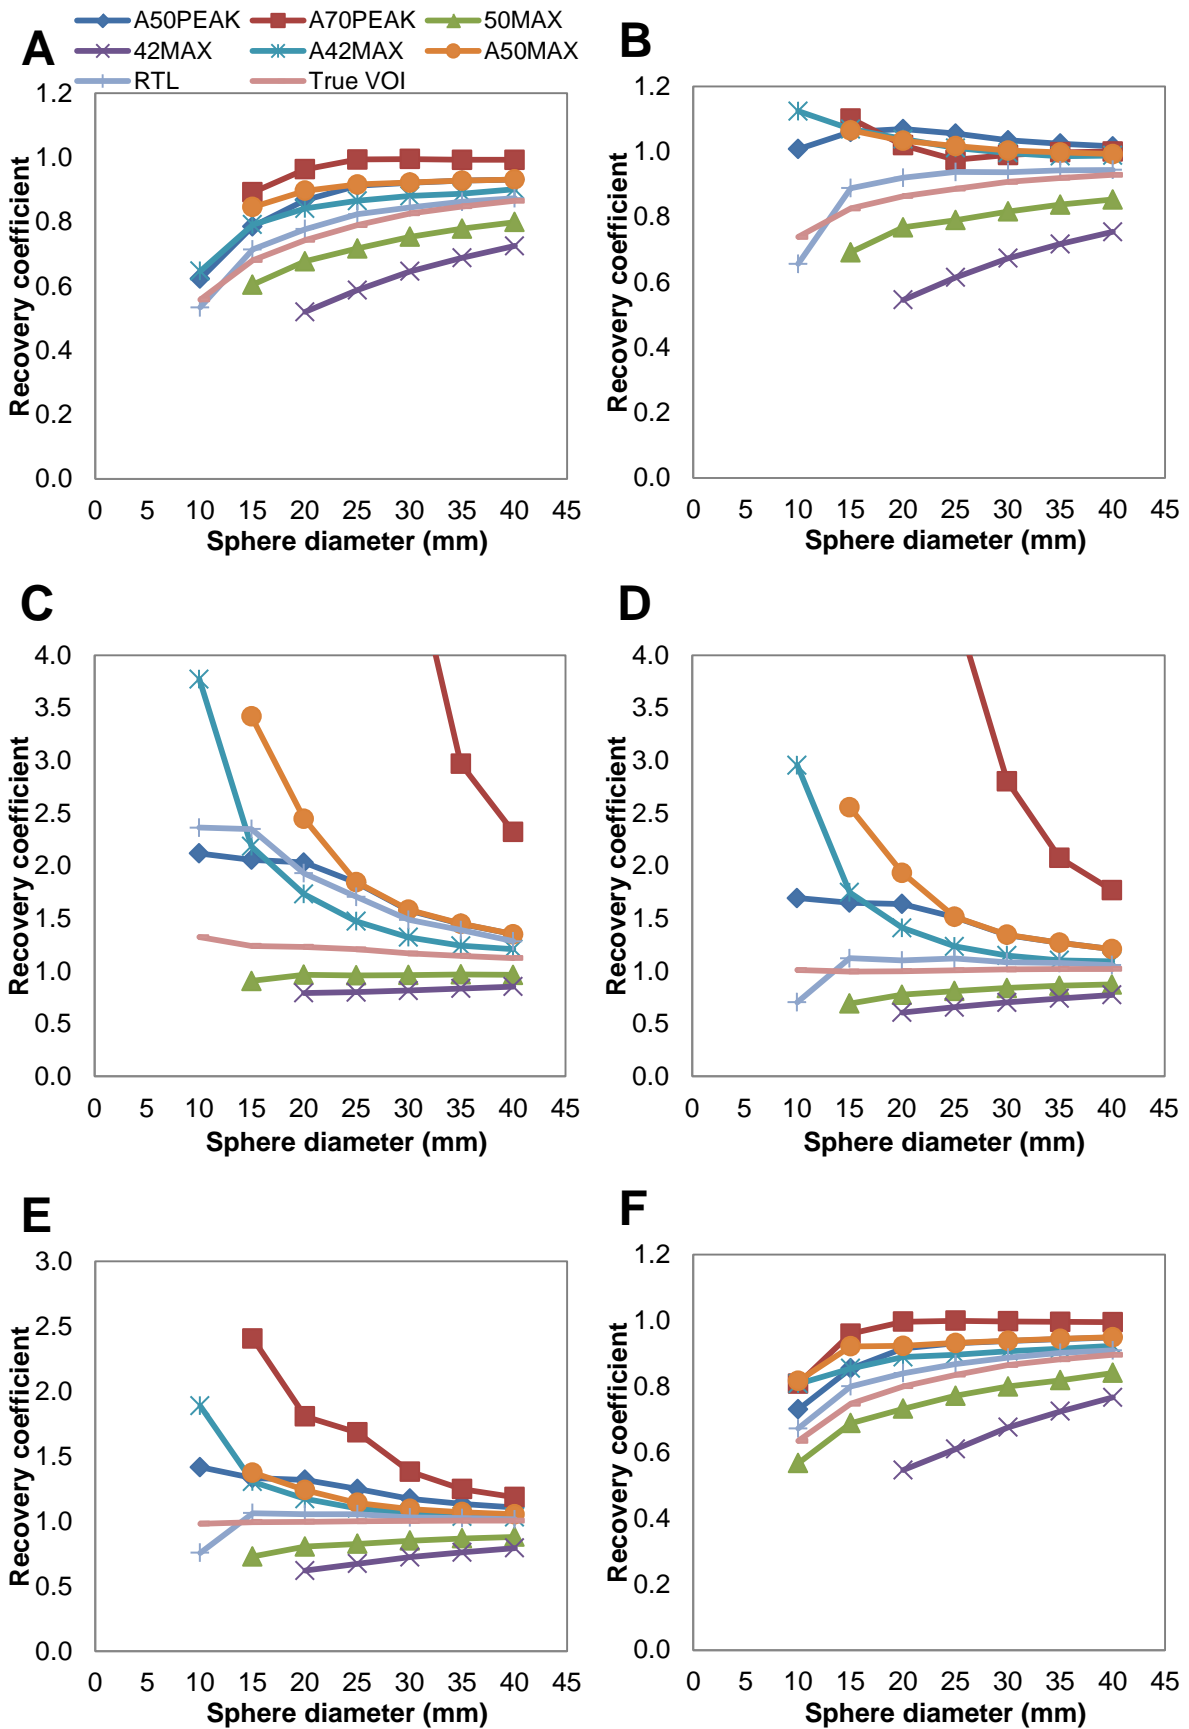

**Supplemental Fig. 1)** Recovery coefficients as a function of sphere diameter: uncorrected (A), IDC-LR (B), HH-GLBL (C), HH-LCL (D), spill-over (E), and PSF-reconstruction (F) of spheres in mediastinum, on noise-less images. Please note: RCs of A70PEAK exceed the y-axis maximum, up to 11.8 and 8.2 in graphs C and D, respectively. Missing values are due to failure of VOI delineation.

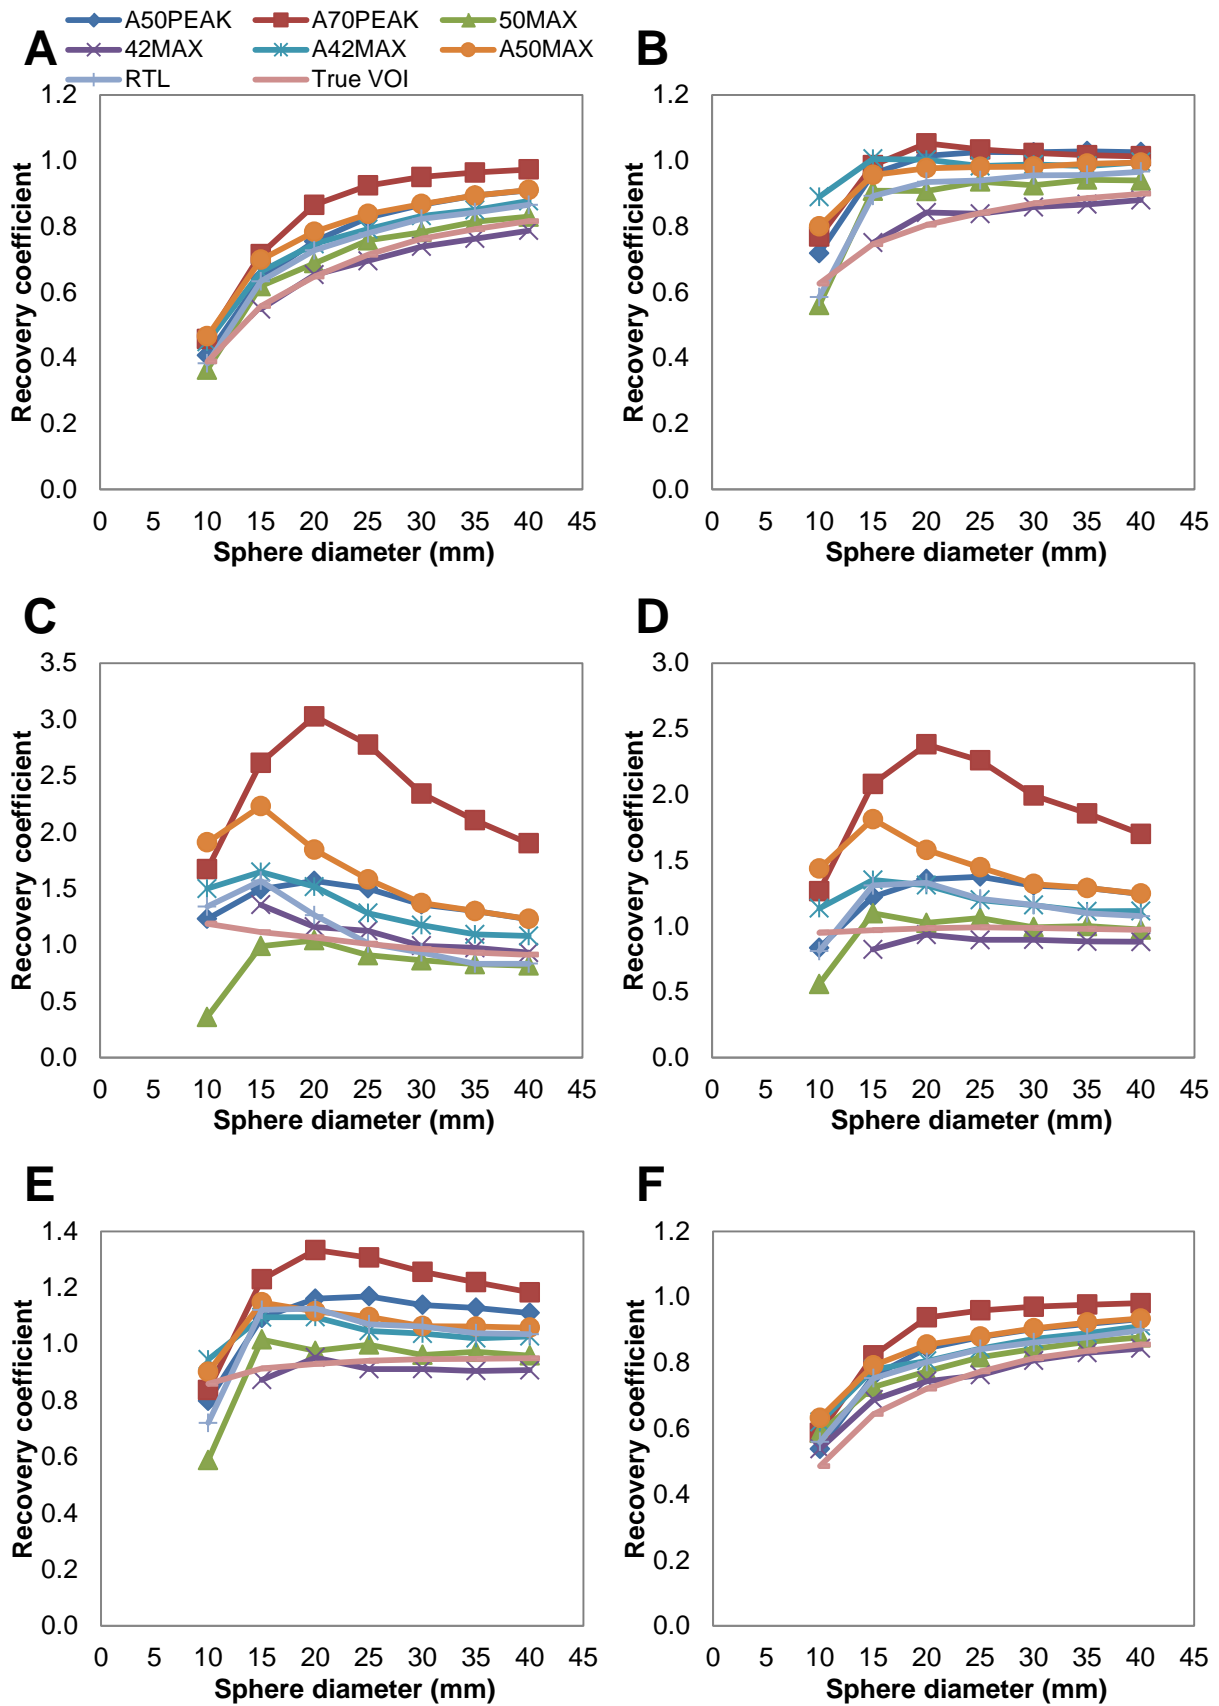

**Supplemental Fig. 2)** Recovery coefficients as a function of sphere diameter: uncorrected (A), IDC-LR (B), HH-GLBL (C), HH-LCL (D), spill-over (E), and PSF reconstruction (F) of spheres in *lung*, on noise-less images. Missing values are due to failure of VOI delineation.

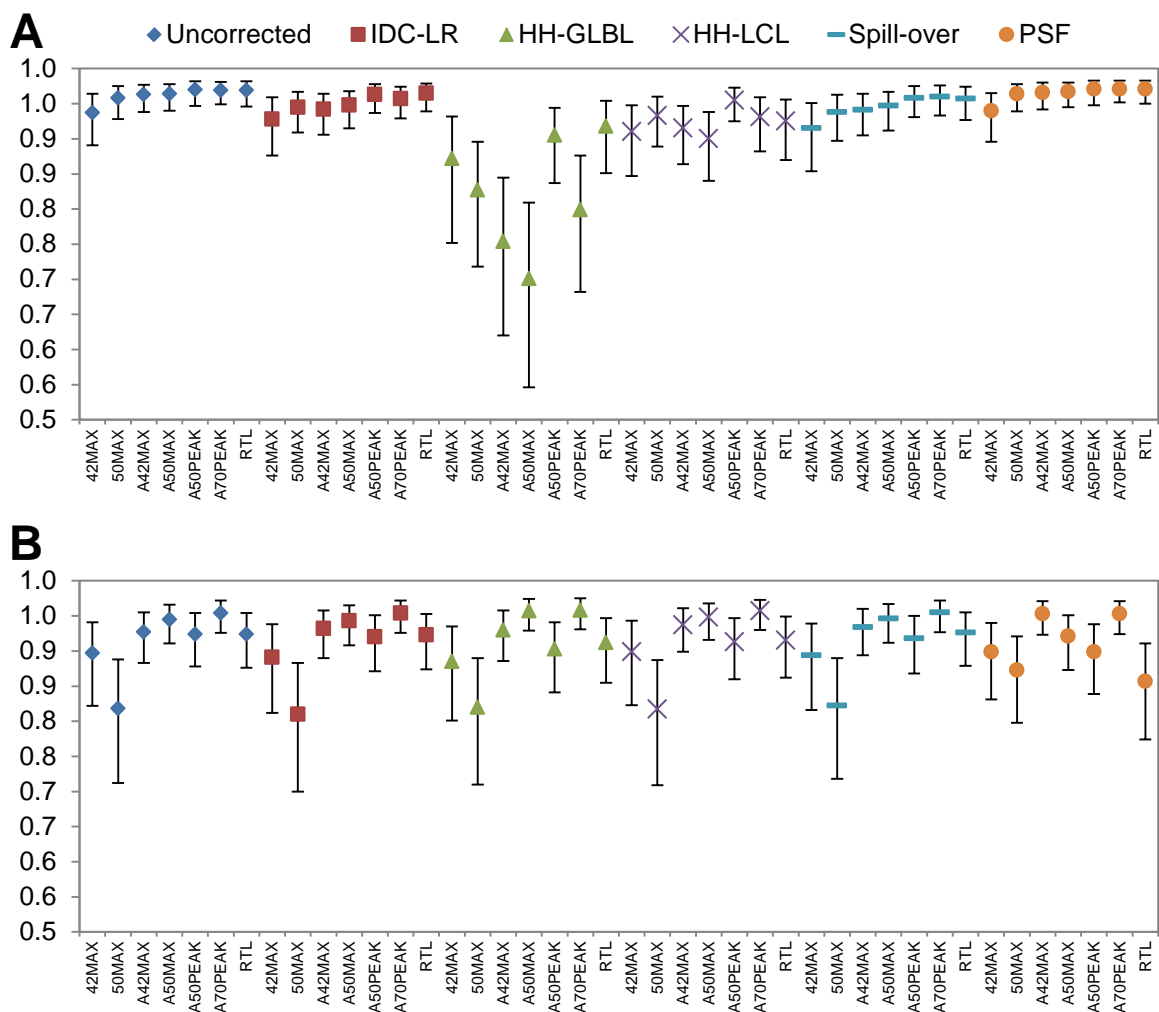

**Supplemental Fig. 3** ICCs of SUVmean (A) and TLG (B) of all combinations of VOI and PVC method. Shown are the results of the  $^{18}\text{F}$ -FCH-PET cohort. Error-bars represent 95% confidence intervals.

| <b>Analysis</b>                                        | <b>Sub-analysis</b>                                                                                                                                              | <b>Data</b>                                |
|--------------------------------------------------------|------------------------------------------------------------------------------------------------------------------------------------------------------------------|--------------------------------------------|
| Resolution kernel calibration                          | -                                                                                                                                                                | Phantom experiment                         |
| Volumetric accuracy<br>non-PSF- vs. PSF-reconstruction | -                                                                                                                                                                | Phantom experiment                         |
| Accuracy of PVC methods                                | Effect of: <ul style="list-style-type: none"> <li>- VOI method</li> <li>- Volumetric accuracy</li> <li>- True VOI misalignment</li> <li>- Noise-level</li> </ul> | Simulations                                |
| Precision of PVC and VOI methods                       | -                                                                                                                                                                | Simulation experiment<br>and clinical data |

**Supplementary Table 1)** Summary of performed analyses and the respective datasets used.

|         |             | Scan 1                |                 |              | Scan 2                |                 |              |
|---------|-------------|-----------------------|-----------------|--------------|-----------------------|-----------------|--------------|
| VOI     | PVC         | feasibility (% of 70) | Median SUVmean* | Median TLG*  | feasibility (% of 70) | Median SUVmean* | Median TLG*  |
| 42MAX   | Uncorrected | 81.4                  | 6.2 (3.5)       | 41.8 (211.2) | 81.4                  | 5.9 (3.9)       | 42.1 (234.2) |
|         | IDC-LR      |                       | 8.2 (6.2)       | 57.6 (245.8) |                       | 7.7 (5.9)       | 54.6 (264.9) |
|         | HH-GLBL     |                       | 9.1 (8)         | 65.3 (304.5) |                       | 9.4 (7.2)       | 73.6 (310.6) |
|         | HH-LCL      |                       | 8.8 (6)         | 63.8 (264)   |                       | 8.5 (6.6)       | 61.6 (277.6) |
|         | Spill-over  |                       | 9.2 (7)         | 67.1 (269.2) |                       | 9.3 (7.2)       | 64.8 (282.8) |
|         | PSF         | 92.9                  | 7.4 (3.9)       | 36.4 (225.1) | 88.6                  | 7.3 (4.6)       | 37.9 (215)   |
| 50MAX   | Uncorrected | 94.3                  | 6.8 (3.5)       | 28.4 (165.8) | 84.3                  | 6.3 (4.4)       | 27.8 (156.4) |
|         | IDC-LR      |                       | 9.5 (7)         | 44 (194.7)   |                       | 8.7 (6.7)       | 38.6 (193.6) |
|         | HH-GLBL     |                       | 11.2 (9.6)      | 60.5 (242.6) |                       | 12.2 (11.4)     | 60.8 (254.7) |
|         | HH-LCL      |                       | 10.5 (7.8)      | 50.5 (224.8) |                       | 10.5 (8.2)      | 47 (217.2)   |
|         | Spill-over  |                       | 10.1 (7.1)      | 46.9 (210.8) |                       | 9.9 (7.5)       | 42.1 (214.7) |
|         | PSF         | 97.1                  | 8.1 (4.6)       | 21.4 (145.6) | 91.4                  | 7.9 (5.4)       | 18.6 (112.7) |
| A42MAX  | Uncorrected | 94.3                  | 6.7 (3.5)       | 18.9 (131.2) | 91.4                  | 6.4 (4.1)       | 18.9 (77.5)  |
|         | IDC-LR      |                       | 9.9 (6.4)       | 30.4 (161.8) |                       | 9.1 (5.4)       | 29.5 (93.7)  |
|         | HH-GLBL     |                       | 13.4 (8.1)      | 54.5 (206.5) |                       | 13.1 (6.7)      | 43.4 (185.8) |
|         | HH-LCL      |                       | 11 (6.9)        | 35.9 (181.9) |                       | 11.3 (6.2)      | 34 (118.1)   |
|         | Spill-over  |                       | 10.1 (6.3)      | 29.9 (175.1) |                       | 9.5 (5.6)       | 29.1 (99.6)  |
|         | PSF         | 97.1                  | 8.1 (4.3)       | 17.7 (109)   | 95.7                  | 7.8 (5)         | 19.5 (54.3)  |
| A50MAX  | Uncorrected | 97.1                  | 7.4 (3.8)       | 13.4 (59.8)  | 91.4                  | 7 (4.4)         | 13.9 (37.8)  |
|         | IDC-LR      |                       | 10.3 (6.1)      | 19.9 (71)    |                       | 9.4 (5.3)       | 19 (43.7)    |
|         | HH-GLBL     |                       | 17.6 (10.7)     | 41 (164.5)   |                       | 19.5 (12.7)     | 40.5 (124.5) |
|         | HH-LCL      |                       | 14 (8.9)        | 30.1 (100.6) |                       | 15.2 (8.1)      | 30.2 (71.9)  |
|         | Spill-over  |                       | 10.1 (5.7)      | 19.3 (75.1)  |                       | 10.3 (5.7)      | 19.7 (47.9)  |
|         | PSF         | 100.0                 | 9 (4.7)         | 12.4 (34.2)  | 94.3                  | 8.8 (5.3)       | 13.7 (31.6)  |
| A50PEAK | Uncorrected | 90.0                  | 6.3 (3.8)       | 24.8 (131.3) | 88.6                  | 6 (4.1)         | 24.8 (116.7) |
|         | IDC-LR      |                       | 9 (5.3)         | 36.8 (162)   |                       | 8.1 (5)         | 37.4 (129.5) |
|         | HH-GLBL     |                       | 11.1 (6.4)      | 50.1 (202.6) |                       | 11.1 (6.5)      | 50.5 (201.4) |
|         | HH-LCL      |                       | 9.4 (6.6)       | 43.1 (188.3) |                       | 9.3 (6)         | 38.9 (173.8) |
|         | Spill-over  |                       | 8.9 (5.6)       | 38.7 (181.8) |                       | 8.8 (5.5)       | 38.9 (161.6) |
|         | PSF         | 97.1                  | 7.3 (4.1)       | 28.3 (166.1) | 95.7                  | 7.1 (4.7)       | 27.3 (120)   |
| A70PEAK | Uncorrected | 97.1                  | 7.3 (4.2)       | 14.8 (34.9)  | 91.4                  | 7.1 (4.6)       | 13.2 (25.4)  |
|         | IDC-LR      |                       | 9.9 (5.8)       | 21.5 (42.4)  |                       | 9.5 (5.4)       | 17.8 (29.3)  |
|         | HH-GLBL     |                       | 20.5 (12.9)     | 37.5 (113.6) |                       | 21.3 (13.2)     | 40.6 (84.8)  |
|         | HH-LCL      |                       | 14.6 (8.8)      | 30.8 (78.7)  |                       | 14.7 (8.7)      | 26.8 (51)    |
|         | Spill-over  |                       | 10 (5.6)        | 21.3 (48.8)  |                       | 9.8 (5.8)       | 18.1 (33.6)  |
|         | PSF         | 100.0                 | 8.2 (5.2)       | 17.2 (38.7)  | 95.7                  | 8.2 (5.6)       | 13.1 (25.4)  |
| RTL     | Uncorrected | 88.6                  | 6 (3.6)         | 36.1 (180.8) | 90.0                  | 5.7 (4.2)       | 35.4 (189.2) |
|         | IDC-LR      |                       | 8.4 (6)         | 53 (206.3)   |                       | 7.8 (5.3)       | 50.8 (206.8) |
|         | HH-GLBL     |                       | 8.9 (6.3)       | 63.7 (248)   |                       | 8.8 (6.9)       | 64.7 (265.9) |
|         | HH-LCL      |                       | 8.9 (6.3)       | 61.5 (243.7) |                       | 8.1 (7.2)       | 61.2 (240.2) |
|         | Spill-over  |                       | 9.6 (6.4)       | 60.8 (234.1) |                       | 8.6 (6.2)       | 60.3 (250.8) |
|         | PSF         | 97.1                  | 7.7 (4.1)       | 31.2 (160.7) | 94.3                  | 7.4 (4.7)       | 25.3 (142.4) |

**Supplemental table 2)** VOI method feasibility (% of 70 lesions successfully delineated) and median SUVmean and TLG for all combinations of VOI and PVC method of the <sup>18</sup>F-FDG-PET cohort. \*numbers in parentheses represent IQR.

|         |             | Scan 1                |                 |              | Scan 2                |                 |              |
|---------|-------------|-----------------------|-----------------|--------------|-----------------------|-----------------|--------------|
| VOI     | PVC         | feasibility (% of 67) | Median SUVmean* | Median TLG*  | feasibility (% of 67) | Median SUVmean* | Median TLG*  |
| 42MAX   | Uncorrected | 74.6                  | 6.4 (3.4)       | 52.6 (92.7)  | 79.1                  | 6.6 (3.9)       | 54.2 (90)    |
|         | IDC-LR      |                       | 8.5 (4.8)       | 70.9 (109.5) |                       | 9.2 (5.5)       | 73.2 (108.7) |
|         | HH-GLBL     |                       | 10.4 (4.6)      | 71.6 (127.5) |                       | 11.2 (5.9)      | 92.5 (150.9) |
|         | HH-LCL      |                       | 9 (5.4)         | 76.8 (124.9) |                       | 9.7 (5.6)       | 86.7 (131.5) |
|         | Spill-over  |                       | 9.3 (5.1)       | 78 (120.8)   |                       | 9.8 (6)         | 83.2 (126.8) |
|         | PSF         | 84.3                  | 7.7 (4.6)       | 55.7 (87.7)  | 80.6                  | 7.4 (4.5)       | 50.1 (70.7)  |
| 50MAX   | Uncorrected | 92.5                  | 6.4 (4)         | 43.6 (73.6)  | 89.6                  | 6.4 (3.7)       | 45.2 (56.6)  |
|         | IDC-LR      |                       | 9.1 (5.9)       | 62.5 (95.8)  |                       | 9.3 (6)         | 60.1 (71.7)  |
|         | HH-GLBL     |                       | 13.8 (8.3)      | 77.3 (135.3) |                       | 14.2 (10.3)     | 82 (134.1)   |
|         | HH-LCL      |                       | 10.7 (7)        | 73.6 (113.8) |                       | 11.1 (8.3)      | 77.1 (95.3)  |
|         | Spill-over  |                       | 9.8 (6)         | 66.3 (106.7) |                       | 9.8 (7)         | 65.4 (82.4)  |
|         | PSF         | 94.3                  | 7.7 (4.6)       | 40 (66.6)    | 92.5                  | 7.6 (5.9)       | 39.6 (51.1)  |
| A42MAX  | Uncorrected | 95.5                  | 6.5 (4)         | 25.8 (51.4)  | 95.5                  | 6.3 (4.2)       | 27.5 (51.4)  |
|         | IDC-LR      |                       | 9.3 (5.5)       | 33.6 (66)    |                       | 9.2 (6.2)       | 35.4 (66.9)  |
|         | HH-GLBL     |                       | 13.5 (7.1)      | 60.7 (104.6) |                       | 14.3 (9.4)      | 67.4 (107)   |
|         | HH-LCL      |                       | 11.2 (6.8)      | 43 (83.5)    |                       | 11.2 (7.2)      | 47.9 (81.2)  |
|         | Spill-over  |                       | 9.3 (5.9)       | 35.6 (70.6)  |                       | 9.2 (6)         | 38.2 (68.3)  |
|         | PSF         | 95.7                  | 7.9 (4.8)       | 27.1 (59.9)  | 95.5                  | 7.6 (5.5)       | 28.2 (48.5)  |
| A50MAX  | Uncorrected | 95.5                  | 7.2 (4.4)       | 17.7 (35.5)  | 97.0                  | 6.8 (4.6)       | 19.3 (31.3)  |
|         | IDC-LR      |                       | 9.2 (5.5)       | 21.4 (42.8)  |                       | 9.3 (6.4)       | 25.5 (39.5)  |
|         | HH-GLBL     |                       | 18.6 (10.4)     | 49.6 (74.7)  |                       | 20.6 (11.1)     | 45.5 (71.2)  |
|         | HH-LCL      |                       | 14.2 (7.2)      | 32.2 (63.4)  |                       | 14.4 (8.4)      | 37.2 (62.9)  |
|         | Spill-over  |                       | 9.3 (5.4)       | 22.5 (46.5)  |                       | 9.3 (6.4)       | 25.4 (40.9)  |
|         | PSF         | 95.7                  | 8.9 (5.1)       | 19 (30.4)    | 97.0                  | 8.2 (6)         | 19.5 (33.1)  |
| A50PEAK | Uncorrected | 94.0                  | 6 (3.8)         | 35.4 (61.4)  | 94.0                  | 5.9 (3.8)       | 35.5 (58.7)  |
|         | IDC-LR      |                       | 8.4 (5.1)       | 47.9 (83.6)  |                       | 8.3 (5.3)       | 48 (76.7)    |
|         | HH-GLBL     |                       | 11.3 (6.3)      | 68 (116.5)   |                       | 12.7 (6)        | 73.3 (110.2) |
|         | HH-LCL      |                       | 9.7 (5.4)       | 59.7 (92.9)  |                       | 9.6 (6.3)       | 60.1 (85.2)  |
|         | Spill-over  |                       | 8.8 (5.3)       | 52.3 (85.1)  |                       | 8.8 (5.5)       | 52.2 (80.7)  |
|         | PSF         | 95.7                  | 7.2 (4.7)       | 41.6 (69.9)  | 95.5                  | 7.1 (4.6)       | 33 (60)      |
| A70PEAK | Uncorrected | 97.0                  | 7.4 (4.2)       | 15.1 (26)    | 98.5                  | 7.3 (4.7)       | 14.4 (26.5)  |
|         | IDC-LR      |                       | 9.6 (5.1)       | 20 (33.8)    |                       | 9.3 (5.7)       | 19.8 (35.8)  |
|         | HH-GLBL     |                       | 21.9 (10.9)     | 47 (75)      |                       | 24.5 (11.1)     | 41.2 (62.9)  |
|         | HH-LCL      |                       | 14.9 (8.6)      | 33.4 (51.6)  |                       | 14.7 (9.4)      | 32.3 (58.9)  |
|         | Spill-over  |                       | 10.3 (5.8)      | 20.9 (34.6)  |                       | 9.5 (6.6)       | 19.9 (37.4)  |
|         | PSF         | 97.1                  | 8.9 (5.1)       | 5.4 (30.8)   | 98.5                  | 8.5 (5.4)       | 17.4 (28.5)  |
| RTL     | Uncorrected | 91.0                  | 6.1 (3.5)       | 43.6 (67.4)  | 94.0                  | 6 (3.6)         | 44.8 (64.2)  |
|         | IDC-LR      |                       | 8.4 (5)         | 58.1 (84.7)  |                       | 8.3 (5.4)       | 60.9 (81.1)  |
|         | HH-GLBL     |                       | 11.1 (7.4)      | 74.4 (123.3) |                       | 12 (7.8)        | 79.1 (110.4) |
|         | HH-LCL      |                       | 11.3 (6.4)      | 72.7 (127.9) |                       | 11 (7.5)        | 79.6 (110.4) |
|         | Spill-over  |                       | 9.4 (5.1)       | 68.3 (94)    |                       | 9.5 (5.9)       | 70.4 (93.2)  |
|         | PSF         | 94.3                  | 7.3 (4.5)       | 46.3 (73.9)  | 95.5                  | 7.1 (5)         | 45.3 (62.6)  |

**Supplemental Table 3)** VOI method feasibility (% of 67 lesions successfully delineated) and median SUVmean and TLG for all combinations of VOI and PVC method of the <sup>18</sup>F-FCH-PET cohort. \*numbers in parentheses represent IQR.

|                | <b>42MAX</b>        | <b>50MAX</b>        | <b>A42MAX</b>       | <b>A50MAX</b>       | <b>A50PEAK</b>      | <b>A70PEAK</b>      | <b>RTL</b>          |
|----------------|---------------------|---------------------|---------------------|---------------------|---------------------|---------------------|---------------------|
| <b>Non-PSF</b> | 0.98<br>(0.97-0.99) | 0.96<br>(0.93-0.97) | 0.92<br>(0.87-0.95) | 0.96<br>(0.94-0.98) | 0.94<br>(0.90-0.96) | 0.95<br>(0.92-0.97) | 0.96<br>(0.94-0.98) |
| <b>PSF</b>     | 0.97<br>(0.94-0.98) | 0.95<br>(0.92-0.97) | 0.95<br>(0.91-0.97) | 0.97<br>(0.95-0.98) | 0.88<br>(0.81-0.93) | 0.89<br>(0.82-0.93) | 0.93<br>(0.88-0.95) |

**Supplementary Table 4)** ICCs of VOI volumes generated on non-PSF- and PSF-reconstructed images in the <sup>18</sup>F-FDG-PET cohort. 95%-CI in parentheses.
